# Supplementary material for: Purification of viable peripheral blood mononuclear cells for biobanking using a robotized liquid handling workstation
Source: PubMed Central journal article supplement (PMC6852781; doi:10.1186/s12967-019-2125-7), 2019-11-12
Supplement: 12967_2019_2125_MOESM1_ESM.pdf [file 12967_2019_2125_MOESM1_ESM.pdf]

## HL60 SPIKED IN WHOLE BLOOD

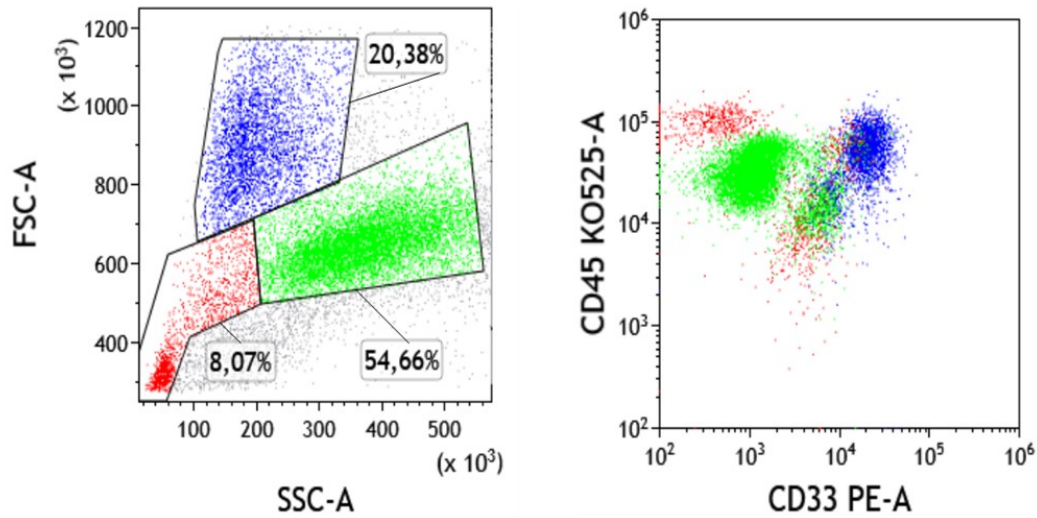

## AUTOMATIC PBMC ISOLATION

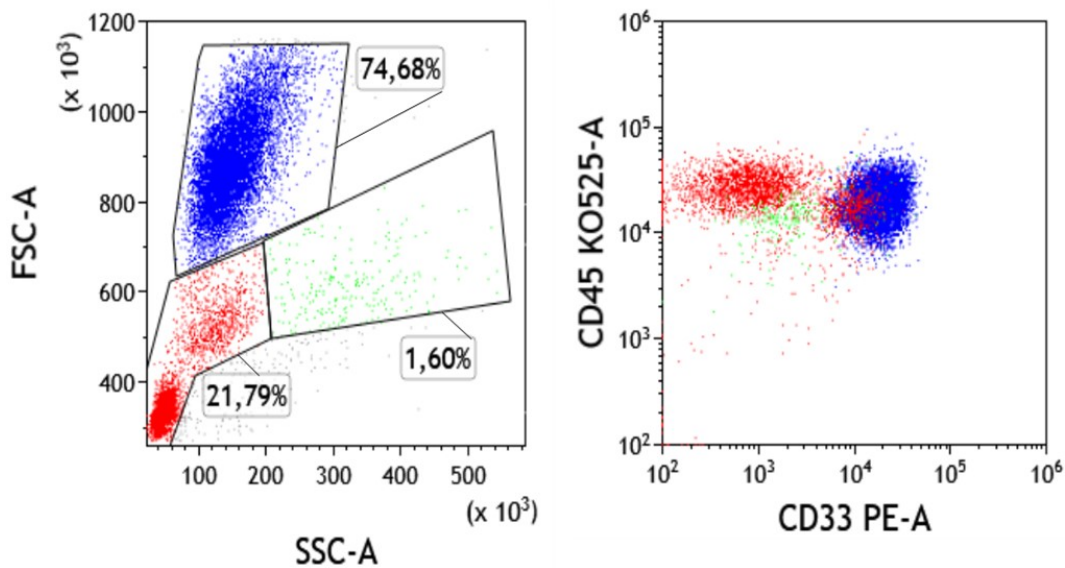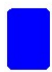

HL60  
cells

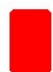

Mononuclear cells  
(Lymphocytes+Monocytes)

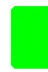

Granulocytes

**Additional file 1: Figure S1.** Purification of mononuclear cells from a peripheral blood sample enriched with HL60 cells to gain a WBC cell density of  $30 \times 10^6$  cells/mL. HL60 (blue), Mononuclear cells (red) and Granulocytes (green) were detectable according to the FSC-A vs SSC-A dot-plot. Granulocytes' population is lost after PBMC automatic isolation, while the percentage of HL60 and mononuclear cells were enriched. CD45 vs CD33 dot-plot is shown to better identify the HL60 cells that derive from CD33 positive human acute myeloid leukemia (M2).
